# Supplementary material
Source: PubMed Central journal article supplement (PMC2801807)
Supplement: NIHMS144221-supplement-Supplementary.pdf [file NIHMS144221-supplement-Supplementary.pdf]

## SUPPLEMENTARY MATERIAL

### Supplementary Figures

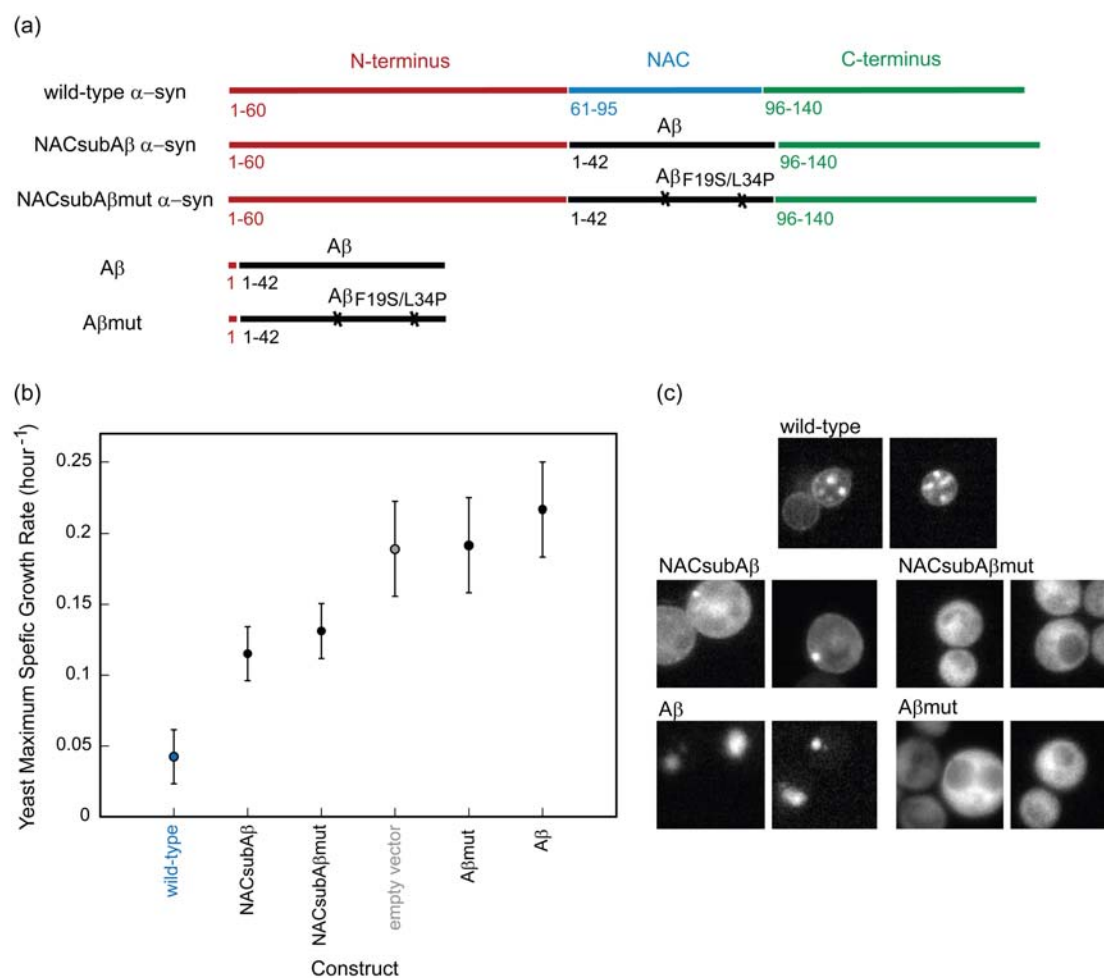

**Figure 1.** Properties of  $\alpha$ -syn/A $\beta_{42}$  chimeras. (a) Schematic illustration of the sequences tested in yeast. The A $\beta_{42}$  F19S/L34P mutant does not aggregate, and was included as a control. (b) Both NACsubA $\beta$  and NACsubA $\beta$ mut variants decreased  $\alpha$ -syn toxicity. When expressed independently, neither A $\beta$  nor A $\beta$ mut were toxic to yeast. (c) Microscopy of GFP-tagged proteins. NACsubA $\beta$  formed fewer aggregates than wild-type; NACsubA $\beta$ mut was cytosolic. A $\beta$  formed intracellular inclusions in yeast, whereas A $\beta$ mut remained dispersed throughout the cytoplasm.

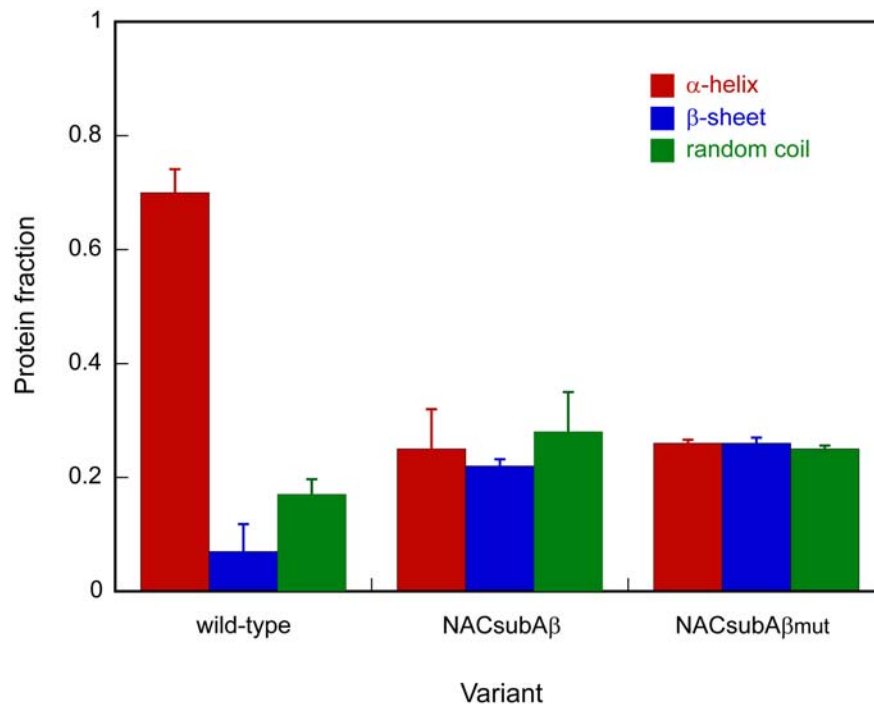

**Figure 2.** Structural content of wild-type  $\alpha$ -syn, NACsubA $\beta$  and NACsubA $\beta$ mut in 4% HFIP, determined by CD spectroscopy.

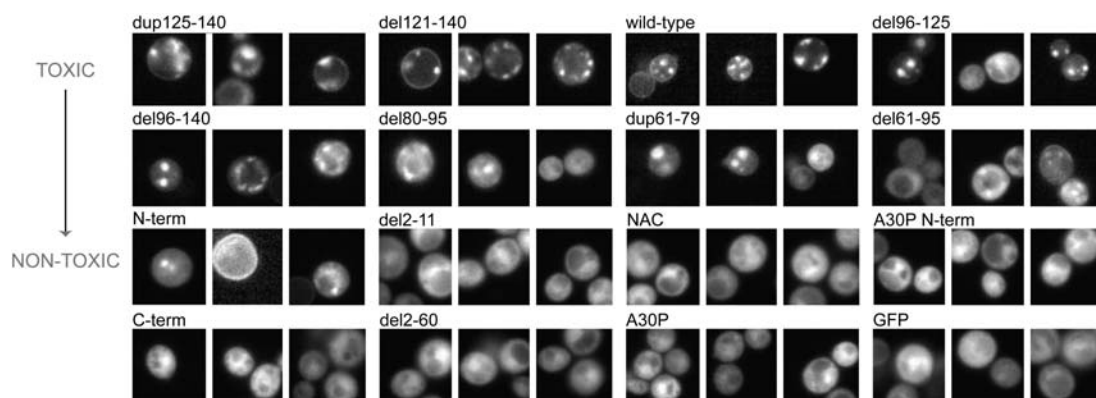

**Figure 3.** Microscopic images of GFP-tagged  $\alpha$ -syn variants, arranged in order of decreasing yeast toxicity. Dup9-30 and del9-30 GFP fusions exhibited very weak fluorescence (data not shown), possibly attributable to GFP misfolding or cell lysis. The representative pictures shown were taken 48 h after induction of protein expression (growth in galactose media), using identical excitation intensity and exposure time.

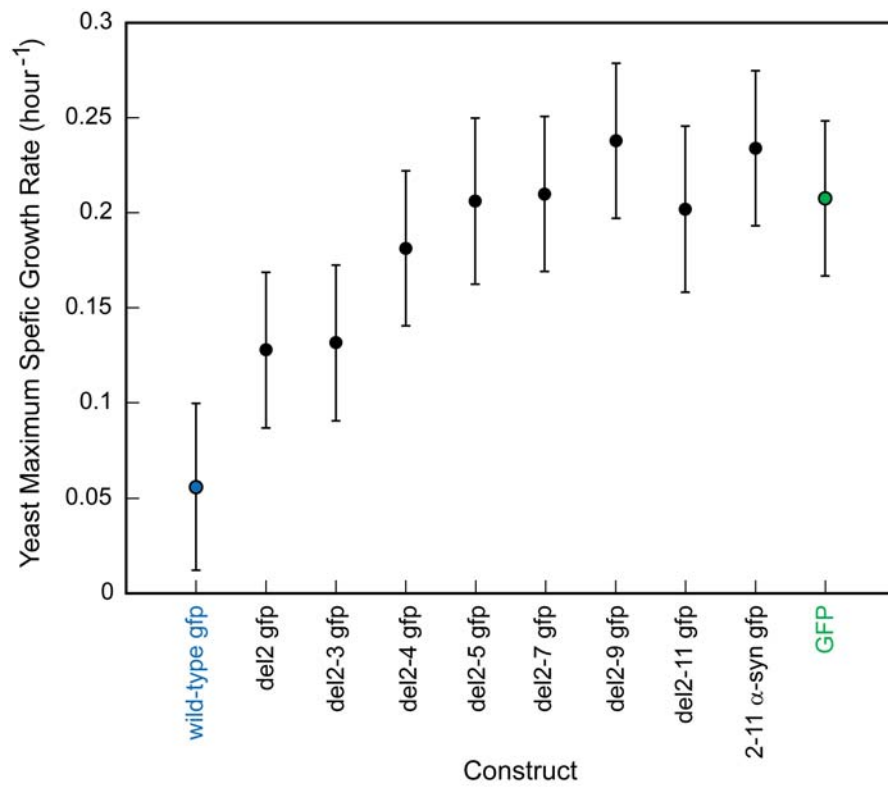

**Figure 4.** Yeast maximum specific growth rate of GFP-tagged  $\alpha$ -syn variants, arranged in order of increasing deletion size. GFP was included as a control.

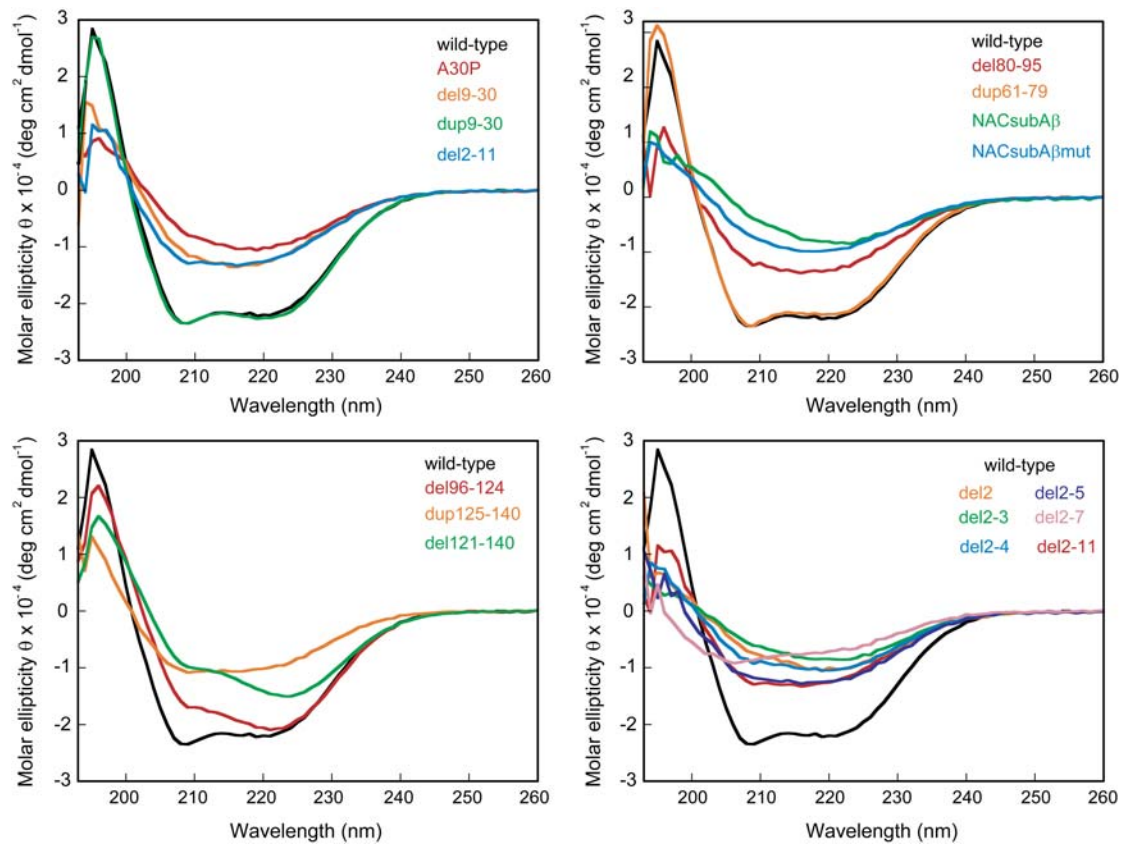

**Figure 5.** CD spectra of  $\alpha$ -syn variants, in the presence of 4% HFIP.

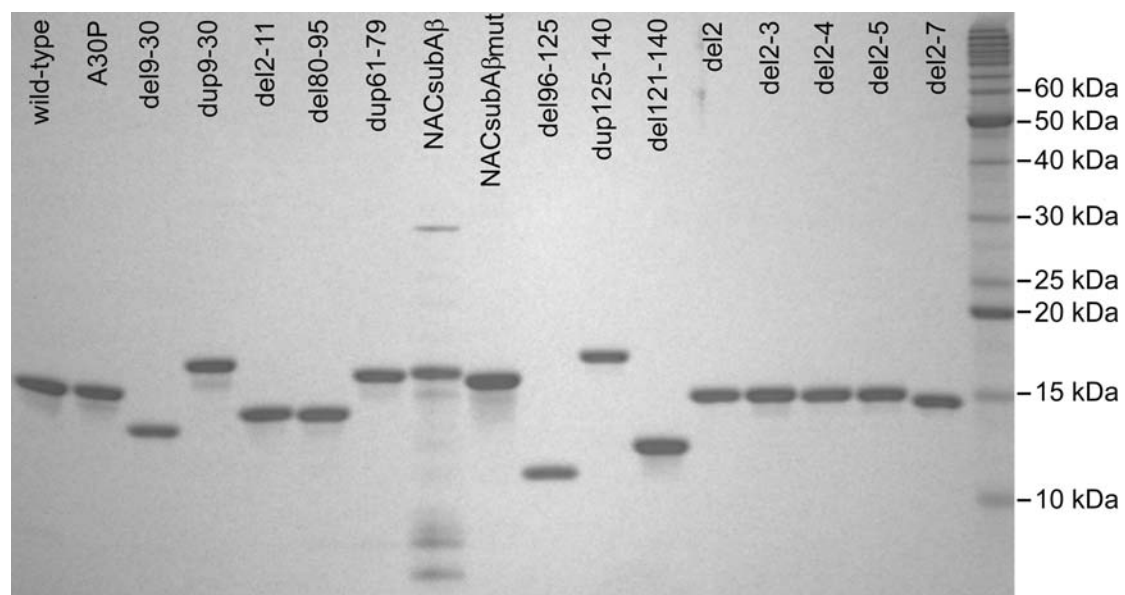

**Figure 6.** SDS PAGE gel of  $\alpha$ -syn variants.

## DNA sequences

### *wild-type $\alpha$ -syn, 420 bp*

ATGGATGTATTCATGAAAGGACTTTCAAAGGCCAAGGAGGGAGTTGTGGCTGCTGCTGAG  
AAAACCAAACAGGGTGTGGCAGAAGCAGCAGGAAAAGACAAAAGAGGGTGTTCCTATGT  
AGGCTCCAAAACCAAGGAGGGAGTGGTGCATGGTGTGGCAACAGTGGCTGAGAAGACCA  
AAGAGCAAGTGACAAATGTTGGAGGAGCAGTGGTGCACGGGTGTGACAGCAGTAGCCCAG  
AAGACAGTGGAGGGAGCAGGGAGCATTGCAGCAGCCACTGGCTTTGTCAAAAAGGACCA  
GTTGGGCAAGAATGAAGAAGGAGCCCCACAGGAAGGAATTCTGGAAGATATGCCTGTGG  
ATCCTGACAATGAGGCTTATGAAATGCCTTCTGAGGAAGGGTATCAAGACTACGAACCTG  
AAGCCTAA

### *dup9-30 $\alpha$ -syn, 486bp*

ATGGATGTATTCATGAAAGGACTTTCAAAGGCCAAGGAGGGAGTTGTGGCTGCAGCTGAG  
AAAACCAAACAGGGTGTGGCCGAAGCGGCCTCAAAGGCCAAGGAGGGAGTTGTGGCTGC  
AGCTGAGAAAACCAAACAGGGTGTGGCAGAAGCAGCAGGAAAAGACAAAAGAGGGTGTTC  
TCTATGTAGGCTCCAAAACCAAGGAGGGAGTGGTGCATGGTGTGGCAACAGTGGCTGAGA  
AGACCAAAGAGCAAGTGACAAATGTTGGAGGAGCAGTGGTGCACGGGTGTGACAGCAGTA  
GCCAGAAGACAGTGGAGGGAGCAGGGAGCATTGCAGCAGCCACTGGCTTTGTCAAAA  
GGACCAGTTGGGCAAGAATGAAGAAGGAGCCCCACAGGAAGGAATTCTGGAAGATATGC  
CTGTGGATCCTGACAATGAGGCTTATGAAATGCCTTCTGAGGAAGGGTATCAAGACTACG  
AACCTGAAGCCTAA

### *del9-30 $\alpha$ -syn, 354bp*

ATGGATGTATTCATGAAAGGACTTGGAAAGACAAAAGAGGGTGTTCCTATGTAGGCTCC  
AAAACCAAGGAGGGAGTGGTGCATGGTGTGGCAACAGTGGCTGAGAAGACCAAAGAGCA  
AGTGACAAATGTTGGAGGAGCAGTGGTGCACGGGTGTGACAGCAGTAGCCCAGAAGACAG  
TGGAGGGAGCAGGGAGCATTGCAGCAGCCACTGGCTTTGTCAAAAAGGACCAGTTGGGC  
AAGAATGAAGAAGGAGCCCCACAGGAAGGAATTCTGGAAGATATGCCTGTGGATCCTGA  
CAATGAGGCTTATGAAATGCCTTCTGAGGAAGGGTATCAAGACTACGAACCTGAAGCCTA  
A

### *del2 $\alpha$ -syn, 417bp*

ATGGTATTCATGAAAGGACTTTCAAAGGCCAAGGAGGGAGTTGTGGCTGCTGCTGAGAAA  
ACCAAACAGGGTGTGGCAGAAGCAGCAGGAAAAGACAAAAGAGGGTGTTCCTATGTAGG  
CTCCAAAACCAAGGAGGGAGTGGTGCATGGTGTGGCAACAGTGGCTGAGAAGACCAAAG  
AGCAAGTGACAAATGTTGGAGGAGCAGTGGTGCACGGGTGTGACAGCAGTAGCCCAGAAG  
ACAGTGGAGGGAGCAGGGAGCATTGCAGCAGCCACTGGCTTTGTCAAAAAGGACCAGTT  
GGGCAAGAATGAAGAAGGAGCCCCACAGGAAGGAATTCTGGAAGATATGCCTGTGGATC  
CTGACAATGAGGCTTATGAAATGCCTTCTGAGGAAGGGTATCAAGACTACGAACCTGAAG  
CCTAA

### *del2-3 $\alpha$ -syn, 414 bp*

ATGTTTCATGAAAGGACTTTCAAAGGCCAAGGAGGGAGTTGTGGCTGCTGCTGAGAAAACC  
AAACAGGGTGTGGCAGAAGCAGCAGGAAAAGACAAAAGAGGGTGTTCCTATGTAGGCTC  
CAAAACCAAGGAGGGAGTGGTGCATGGTGTGGCAACAGTGGCTGAGAAGACCAAAGAGC  
AAGTGACAAATGTTGGAGGAGCAGTGGTGCACGGGTGTGACAGCAGTAGCCCAGAAGACA  
GTGGAGGGAGCAGGGAGCATTGCAGCAGCCACTGGCTTTGTCAAAAAGGACCAGTTGGG  
CAAGAATGAAGAAGGAGCCCCACAGGAAGGAATTCTGGAAGATATGCCTGTGGATCCTG  
ACAATGAGGCTTATGAAATGCCTTCTGAGGAAGGGTATCAAGACTACGAACCTGAAGCCT  
AA

*del2-4 α-syn, 411bp*

ATGATGAAAGGACTTTCAAAGGCCAAGGAGGGAGTTGTGGCTGCTGCTGAGAAAACCAA  
ACAGGGTGTGGCAGAAGCAGCAGGAAAAGACAAAAGAGGGTGTCTCTATGTAGGCTCCA  
AAACCAAGGAGGGAGTGGTGCATGGTGTGGCAACAGTGGCTGAGAAGACCAAAGAGCAA  
GTGACAAATGTTGGAGGAGCAGTGGTGACGGGTGTGACAGCAGTAGCCCAGAAGACAGT  
GGAGGGAGCAGGGAGCATTGCAGCAGCCACTGGCTTTGTCAAAAAGGACCAGTTGGGCA  
AGAATGAAGAAGGAGCCCCACAGGAAGGAATTCTGGAAGATATGCCTGTGGATCCTGAC  
AATGAGGCTTATGAAATGCCTTCTGAGGAAGGGTATCAAGACTACGAACCTGAAGCCTAA

*del2-5 α-syn, 408bp*

ATGAAAGGACTTTCAAAGGCCAAGGAGGGAGTTGTGGCTGCTGCTGAGAAAACCAAACA  
GGGTGTGGCAGAAGCAGCAGGAAAAGACAAAAGAGGGTGTCTCTATGTAGGCTCCAAAA  
CCAAGGAGGGAGTGGTGCATGGTGTGGCAACAGTGGCTGAGAAGACCAAAGAGCAAGTG  
ACAAATGTTGGAGGAGCAGTGGTGACGGGTGTGACAGCAGTAGCCCAGAAGACAGTGGGA  
GGAGCAGGGAGCATTGCAGCAGCCACTGGCTTTGTCAAAAAGGACCAGTTGGGCAAGA  
ATGAAGAAGGAGCCCCACAGGAAGGAATTCTGGAAGATATGCCTGTGGATCCTGACAATG  
AGGCTTATGAAATGCCTTCTGAGGAAGGGTATCAAGACTACGAACCTGAAGCCTAA

*del2-7 α-syn, 402bp*

ATGCTTTCAAAGGCCAAGGAGGGAGTTGTGGCTGCTGCTGAGAAAACCAAACAGGGTGTG  
GCAGAAGCAGCAGGAAAAGACAAAAGAGGGTGTCTCTATGTAGGCTCCAAAACCAAGGA  
GGGAGTGGTGCATGGTGTGGCAACAGTGGCTGAGAAGACCAAAGAGCAAGTGACAAATG  
TTGGAGGAGCAGTGGTGACGGGTGTGACAGCAGTAGCCCAGAAGACAGTGGAGGGAGCA  
GGGAGCATTGCAGCAGCCACTGGCTTTGTCAAAAAGGACCAGTTGGGCAAGAATGAAGA  
AGGAGCCCCACAGGAAGGAATTCTGGAAGATATGCCTGTGGATCCTGACAATGAGGCTTA  
TGAATGCCTTCTGAGGAAGGGTATCAAGACTACGAACCTGAAGCCTAA

*del2-9 α-syn, 396bp*

ATGAAGGCCAAGGAGGGAGTTGTGGCTGCTGCTGAGAAAACCAAACAGGGTGTGGCAGA  
AGCAGCAGGAAAAGACAAAAGAGGGTGTCTCTATGTAGGCTCCAAAACCAAGGAGGGAG  
TGGTGCATGGTGTGGCAACAGTGGCTGAGAAGACCAAAGAGCAAGTGACAAATGTTGGA  
GGAGCAGTGGTGACGGGTGTGACAGCAGTAGCCCAGAAGACAGTGGAGGGAGCAGGGAG  
CATTGCAGCAGCCACTGGCTTTGTCAAAAAGGACCAGTTGGGCAAGAATGAAGAAGGAG  
CCCCACAGGAAGGAATTCTGGAAGATATGCCTGTGGATCCTGACAATGAGGCTTATGAAA  
TGCCTTCTGAGGAAGGGTATCAAGACTACGAACCTGAAGCCTAA

*del2-11 α-syn, 390bp*

ATGAAGGAGGGAGTTGTGGCTGCTGCTGAGAAAACCAAACAGGGTGTGGCAGAAGCAGC  
AGGAAAAGACAAAAGAGGGTGTCTCTATGTAGGCTCCAAAACCAAGGAGGGAGTGGTGC  
ATGGTGTGGCAACAGTGGCTGAGAAGACCAAAGAGCAAGTGACAAATGTTGGAGGAGCA  
GTGGTGACGGGTGTGACAGCAGTAGCCCAGAAGACAGTGGAGGGAGCAGGGAGCATTGC  
AGCAGCCACTGGCTTTGTCAAAAAGGACCAGTTGGGCAAGAATGAAGAAGGAGCCCCAC  
AGGAAGGAATTCTGGAAGATATGCCTGTGGATCCTGACAATGAGGCTTATGAAATGCCTT  
CTGAGGAAGGGTATCAAGACTACGAACCTGAAGCCTAA

*A30P α-syn, 420bp*

ATGGATGTATTCATGAAAGGACTTTCAAAGGCCAAGGAGGGAGTTGTGGCTGCTGCTGAG  
AAAACCAAACAGGGTGTGGCAGAAGCACCAGGAAAAGACAAAAGAGGGTGTCTCTATGT  
AGGCTCCAAAACCAAGGAGGGAGTGGTGCATGGTGTGGCAACAGTGGCTGAGAAGACCA

AAGAGCAAGTGACAAATGTTGGAGGAGCAGTGGTGACGGGTGTGACAGCAGTAGCCCAG  
AAGACAGTGGAGGGAGCAGGGAGCATTGCAGCAGCCACTGGCTTTGTCAAAAAGGACCA  
GTTGGGCAAGAATGAAGAAGGAGCCCCACAGGAAGGAATTCTGGAAGATATGCCTGTGG  
ATCCTGACAATGAGGCTTATGAAATGCCTTCTGAGGAAGGGTATCAAGACTACGAACCTG  
AAGCCTAA

*del2-60 α-syn, 243bp*

ATGGAGCAAGTGACAAATGTTGGAGGAGCAGTGGTGACGGGTGTGACAGCAGTAGCCCA  
GAAGACAGTGGAGGGAGCAGGGAGCATTGCAGCAGCCACTGGCTTTGTCAAAAAGGACC  
AGTTGGGCAAGAATGAAGAAGGAGCCCCACAGGAAGGAATTCTGGAAGATATGCCTGTG  
GATCCTGACAATGAGGCTTATGAAATGCCTTCTGAGGAAGGGTATCAAGACTACGAACCT  
GAAGCCTAA

*N-term, 180bp*

ATGGATGTATTCATGAAAGGACTTTCAAAGGCCAAGGAGGGAGTTGTGGCTGCTGCTGAG  
AAAACCAAACAGGGTGTGGCAGAAGCAGCAGGAAAGACAAAAGAGGGTGTCTCTATGT  
AGGCTCCAAAACCAAGGAGGGAGTGGTGCATGGTGTGGCAACAGTGGCTGAGAAGACCA  
AATAA

*A30P N-term, 180bp*

ATGGATGTATTCATGAAAGGACTTTCAAAGGCCAAGGAGGGAGTTGTGGCTGCTGCTGAG  
AAAACCAAACAGGGTGTGGCAGAAGCACCAGGAAAGACAAAAGAGGGTGTCTCTATGT  
AGGCTCCAAAACCAAGGAGGGAGTGGTGCATGGTGTGGCAACAGTGGCTGAGAAGACCA  
AATAA

*dup61-79 α-syn, 477 bp*

ATGGATGTATTCATGAAAGGACTTTCAAAGGCCAAGGAGGGAGTTGTGGCTGCTGCTGAG  
AAAACCAAACAGGGTGTGGCAGAAGCAGCAGGAAAGACAAAAGAGGGTGTCTCTATGT  
AGGCTCCAAAACCAAGGAGGGAGTGGTGCATGGTGTGGCAACAGTGGCTGAGAAGACCA  
AAGAACAGGTTACCAACGTGGGTGGTGTCTGTTGTTACCGGGTTACCGCTGTTGCACAAG  
AGCAAGTGACAAATGTTGGAGGAGCAGTGGTGACGGGTGTGACAGCAGTAGCCCAGAAG  
ACAGTGGAGGGAGCAGGGAGCATTGCAGCAGCCACTGGCTTTGTCAAAAAGGACCAGTT  
GGGCAAGAATGAAGAAGGAGCCCCACAGGAAGGAATTCTGGAAGATATGCCTGTGGATC  
CTGACAATGAGGCTTATGAAATGCCTTCTGAGGAAGGGTATCAAGACTACGAACCTGAAG  
CCTAA

*del80-95 α-syn, 372bp*

ATGGATGTATTCATGAAAGGACTTTCAAAGGCCAAGGAGGGAGTTGTGGCTGCTGCTGAG  
AAAACCAAACAGGGTGTGGCAGAAGCAGCAGGAAAGACAAAAGAGGGTGTCTCTATGT  
AGGCTCCAAAACCAAGGAGGGAGTGGTGCATGGTGTGGCAACAGTGGCTGAGAAGACCA  
AAGAACAGGTTACCAACGTGGGTGGTGTCTGTTGTTACCGGGTTACCGCTGTTGCACAAA  
AAAAGGACCAGTTGGGCAAGAATGAAGAAGGAGCCCCACAGGAAGGAATTCTGGAAGAT  
ATGCCTGTGGATCCTGACAATGAGGCTTATGAAATGCCTTCTGAGGAAGGGTATCAAGAC  
TACGAACCTGAAGCCTAA

*del61-95 α-syn, 315bp*

ATGGATGTATTCATGAAAGGACTTTCAAAGGCCAAGGAGGGAGTTGTGGCTGCTGCTGAG  
AAAACCAAACAGGGTGTGGCAGAAGCAGCAGGAAAGACAAAAGAGGGTGTCTCTATGT  
AGGCTCCAAAACCAAGGAGGGAGTGGTGCATGGTGTGGCAACAGTGGCTGAGAAGACCA  
AAAAAAGGACCAGTTGGGCAAGAATGAAGAAGGAGCCCCACAGGAAGGAATTCTGGAA

GATATGCCTGTGGATCCTGACAATGAGGCTTATGAAATGCCTTCTGAGGAAGGGTATCAA  
GACTACGAACCTGAAGCCTAA  
*NAC, 108bp*

ATGGAGCAAGTGACAAATGTTGGAGGAGCAGTGGTGACGGGTGTGACAGCAGTAGCCCA  
GAAGACAGTGGAGGGAGCAGGGAGCATTGCAGCAGCCACTGGCTTTGTCTAA

*dup125-410  $\alpha$ -syn, 468bp*

ATGGATGTATTCATGAAAGGACTTTCAAAGGCCAAGGAGGGAGTTGTGGCTGCTGCTGAG  
AAAACCAAACAGGGTGTGGCAGAAGCAGCAGGAAAAGACAAAAGAGGGTGTCTCTATGT  
AGGCTCCAAAACCAAGGAGGGAGTGGTGCATGGTGTGGCAACAGTGGCTGAGAAGACCA  
AAGAGCAAGTGACAAATGTTGGAGGAGCAGTGGTGACGGGTGTGACAGCAGTAGCCAG  
AAGACAGTGGAGGGAGCAGGGAGCATTGCAGCAGCCACTGGCTTTGTCAAAAAGGACCA  
GTTGGGCAAGAATGAAGAAGGAGCCCCACAGGAAGGAATTCTGGAAGATATGCCTGTGG  
ATCCTGACAATGAGGCTTATGAAATGCCTTCTGAGGAAGGGTATCAAGACTACGAACCTG  
AAGCCTACGAGATGCCAAGCGAAGAGGGTTACCAGGATTATGAGCCAGAGGCATAA

*del96-124  $\alpha$ -syn, 333bp*

ATGGATGTATTCATGAAAGGACTTTCAAAGGCCAAGGAGGGAGTTGTGGCTGCTGCTGAG  
AAAACCAAACAGGGTGTGGCAGAAGCAGCAGGAAAAGACAAAAGAGGGTGTCTCTATGT  
AGGCTCCAAAACCAAGGAGGGAGTGGTGCATGGTGTGGCAACAGTGGCTGAGAAGACCA  
AAGAGCAAGTGACAAATGTTGGAGGAGCAGTGGTGACGGGTGTGACAGCAGTAGCCAG  
AAGACAGTGGAGGGAGCAGGGAGCATTGCAGCAGCCACTGGCTTTGTCTACGAGATGCCA  
AGCGAAGAGGGTTACCAGGATTATGAGCCAGAGGCATAA

*del121-140  $\alpha$ -syn, 360 bp*

ATGGATGTATTCATGAAAGGACTTTCAAAGGCCAAGGAGGGAGTTGTGGCTGCTGCTGAG  
AAAACCAAACAGGGTGTGGCAGAAGCAGCAGGAAAAGACAAAAGAGGGTGTCTCTATGT  
AGGCTCCAAAACCAAGGAGGGAGTGGTGCATGGTGTGGCAACAGTGGCTGAGAAGACCA  
AAGAGCAAGTGACAAATGTTGGAGGAGCAGTGGTGACGGGTGTGACAGCAGTAGCCAG  
AAGACAGTGGAGGGAGCAGGGAGCATTGCAGCAGCCACTGGCTTTGTCAAAAAGGACCA  
GTTGGGCAAGAATGAAGAAGGAGCCCCACAGGAAGGAATTCTGGAAGATATGCCTGTGG  
ATCCTTAA

*del96-140  $\alpha$ -syn, 285bp*

ATGGATGTATTCATGAAAGGACTTTCAAAGGCCAAGGAGGGAGTTGTGGCTGCTGCTGAG  
AAAACCAAACAGGGTGTGGCAGAAGCAGCAGGAAAAGACAAAAGAGGGTGTCTCTATGT  
AGGCTCCAAAACCAAGGAGGGAGTGGTGCATGGTGTGGCAACAGTGGCTGAGAAGACCA  
AAGAGCAAGTGACAAATGTTGGAGGAGCAGTGGTGACGGGTGTGACAGCAGTAGCCAG  
AAGACAGTGGAGGGAGCAGGGAGCATTGCAGCAGCCACTGGCTTTGTCTAA

*C-term, 138bp*

ATGAAAAGGACCAGTTGGGCAAGAATGAAGAAGGAGCCCCACAGGAAGGAATTCTGGA  
AGATATGCCTGTGGATCCTGACAATGAGGCTTATGAAATGCCTTCTGAGGAAGGGTATCA  
AGACTACGAACCTGAAGCCTAA

*NACsubA $\beta$   $\alpha$ -syn, 441bp*

ATGGATGTATTCATGAAAGGACTTTCAAAGGCCAAGGAGGGAGTTGTGGCTGCTGCTGAG  
AAAACCAAACAGGGTGTGGCAGAAGCAGCAGGAAAAGACAAAAGAGGGTGTCTCTATGT  
AGGCTCCAAAACCAAGGAGGGAGTGGTGCATGGTGTGGCAACAGTGGCTGAGAAGACCA



AAGACGCTGAATTCAGACACGACTCTGGTTACGAAGTTCACCACCAAAAAGTTGGTTTTCTT  
CGCTGAAGACGTTGGTTCTAACAAGGGTGCTATCATCGGTTTGATGGTTGGTGGTGGTGGT  
ATCGCTAAAAAGGACCAGTTGGGCAAGAATGAAGAAGGAGCCCCACAGGAAGGAATTCT  
GGAAGMDVFMKGLSKAKEGVVAAAEEKTKQGVAAEAGKTKEGVLYVGSKTKEGVVHGVAT  
VAEKTKDAEFRHDSGYEVHHQKLVFFAEDVGSNKGAIIGLMVGGVVIAKKDQLGKNEEGAP  
QEGILEDMPVDPDNEAYEMPSEEGYQDYEPAAATATGCCTGTGGATCCTGACAATGAGGCT  
TATGAAATGCCTTCTGAGGAAGGGTATCAAGACTACGAACCTGAAGCCTAA

*NACsubA $\beta_{mut}$   $\alpha$ -syn, 441bp*

ATGGATGTATTCATGAAAGGACTTTCAAAGGCCAAGGAGGGAGTTGTGGCTGCTGCTGAG  
AAAACCAAACAGGGTGTGGCAGAAGCAGCAGGAAAAGACAAAAGAGGGTGTCTCTATGT  
AGGCTCCAAAACCAAGGAGGGAGTGGTGCATGGTGTGGCAACAGTGGCTGAGAAGACCA  
AAGACGCTGAATTCAGACACGACTCTGGTTACGAAGTTCACCACCAAAAAGTTGGTTTTCTT  
CGCTGAAGACGTTGGTTCTAACAAGGGTGCTATCATCGGTCCGATGGTTGGTGGTGGTGGT  
ATCGCTAAAAAGGACCAGTTGGGCAAGAATGAAGAAGGAGCCCCACAGGAAGGAATTCT  
GGAAGATATGCCTGTGGATCCTGACAATGAGGCTTATGAAATGCCTTCTGAGGAAGGGTA  
TCAAGACTACGAACCTGAAGCCTAA

*A $\beta_{42}$ , 129bp*

ATGGACGCTGAATTCAGACACGACTCTGGTTACGAAGTTCACCACCAAAAAGTTGGTTTTCT  
TCGCTGAAGACGTTGGTTCTAACAAGGGTGCTATCATCGGTTTGATGGTTGGTGGTGGTGGT  
TATCGCTTAA

*A $\beta_{mut}$ , 129bp*

ATGGACGCTGAATTCAGACACGACTCTGGTTACGAAGTTCACCACCAAAAAGTTGGTTTTCT  
TCGCTGAAGACGTTGGTTCTAACAAGGGTGCTATCATCGGTCCGATGGTTGGTGGTGGTGGT  
TATCGCTTAA

## Protein sequences

### *wild-type $\alpha$ -syn*

MDVFMKGLSKAKEGVVAAAETKQGVAAEAGKTKEGVLYVGSKTKEGVVHGVATVAEKT  
KEQVTNVGGAVVTGVTAVAQKTVEGAGSIAAATGFVKKDQLGKNEEGAPQEGILEDMPVDP  
DNEAYEMPSEEGYQDYEPEA

### *dup9-30 $\alpha$ -syn*

MDVFMKGLSKAKEGVVAAAETKQGVAAEASKAKEGVVAAAETKQGVAAEAGKTKEGV  
LYVGSKTKEGVVHGVATVAEKTKEQVTNVGGAVVTGVTAVAQKTVEGAGSIAAATGFVKK  
DQLGKNEEGAPQEGILEDMPVDPDNEAYEMPSEEGYQDYEPEA

### *del9-30 $\alpha$ -syn*

MDVFMKGLGKTKEGVLYVGSKTKEGVVHGVATVAEKTKEQVTNVGGAVVTGVTAVAQKT  
VEGAGSIAAATGFVKKDQLGKNEEGAPQEGILEDMPVDPDNEAYEMPSEEGYQDYEPEA

### *del2 $\alpha$ -syn*

MVFMKGLSKAKEGVVAAAETKQGVAAEAGKTKEGVLYVGSKTKEGVVHGVATVAEKT  
EQVTNVGGAVVTGVTAVAQKTVEGAGSIAAATGFVKKDQLGKNEEGAPQEGILEDMPVDP  
NEAYEMPSEEGYQDYEPEA

### *del2-3 $\alpha$ -syn*

MFMKGLSKAKEGVVAAAETKQGVAAEAGKTKEGVLYVGSKTKEGVVHGVATVAEKTKE  
QVTNVGGAVVTGVTAVAQKTVEGAGSIAAATGFVKKDQLGKNEEGAPQEGILEDMPVDPDN  
EAYEMPSEEGYQDYEPEA

### *del2-4 $\alpha$ -syn*

MMKGLSKAKEGVVAAAETKQGVAAEAGKTKEGVLYVGSKTKEGVVHGVATVAEKTKEQ  
VTNVGGAVVTGVTAVAQKTVEGAGSIAAATGFVKKDQLGKNEEGAPQEGILEDMPVDPDNE  
AYEMPSEEGYQDYEPEA

### *del2-5 $\alpha$ -syn*

MKGLSKAKEGVVAAAETKQGVAAEAGKTKEGVLYVGSKTKEGVVHGVATVAEKTKEQVT  
NVGGAVVTGVTAVAQKTVEGAGSIAAATGFVKKDQLGKNEEGAPQEGILEDMPVDPDNEAY  
EMPSEEGYQDYEPEA

### *del2-7 $\alpha$ -syn*

MLSKAKEGVVAAAETKQGVAAEAGKTKEGVLYVGSKTKEGVVHGVATVAEKTKEQVTNV  
GGAVVTGVTAVAQKTVEGAGSIAAATGFVKKDQLGKNEEGAPQEGILEDMPVDPDNEAYEM  
PSEEGYQDYEPEA

### *del2-11 $\alpha$ -syn*

MKEGVVAAAETKQGVAAEAGKTKEGVLYVGSKTKEGVVHGVATVAEKTKEQVTNVGGA  
VVTGVTAVAQKTVEGAGSIAAATGFVKKDQLGKNEEGAPQEGILEDMPVDPDNEAYEMPSEE  
GYQDYEPEA

*A30P  $\alpha$ -syn*

MDVFMKGLSKAKEGVVAAAETKQGVAAEAPGKTKEGVLYVGSKTKEGVVHGVATVAEKT  
KEQVTNVGGAVVTGVTAVAQKTVEGAGSIAAATGFVKKDQLGKNEEGAPQEGILEDMPVDP  
DNEAYEMPSEEGYQDYEPEA

*dup61-79  $\alpha$ -syn*

MDVFMKGLSKAKEGVVAAAETKQGVAAEAGKTKEGVLYVGSKTKEGVVHGVATVAEKT  
KEQVTNVGGAVVTGVTAVAQEQVTNVGGAVVTGVTAVAQKTVEGAGSIAAATGFVKKDQL  
GKNEEGAPQEGILEDMPVDPDNEAYEMPSEEGYQDYEPEA

*del80-95  $\alpha$ -syn*

MDVFMKGLSKAKEGVVAAAETKQGVAAEAGKTKEGVLYVGSKTKEGVVHGVATVAEKT  
KEQVTNVGGAVVTGVTAVAQKKDQLGKNEEGAPQEGILEDMPVDPDNEAYEMPSEEGYQD  
YEPEA

*dup125-410  $\alpha$ -syn*

MDVFMKGLSKAKEGVVAAAETKQGVAAEAGKTKEGVLYVGSKTKEGVVHGVATVAEKT  
KEQVTNVGGAVVTGVTAVAQKTVEGAGSIAAATGFVKKDQLGKNEEGAPQEGILEDMPVDP  
DNEAYEMPSEEGYQDYEPEAYEMPSEEGYQDYEPEA

*del96-124  $\alpha$ -syn*

MDVFMKGLSKAKEGVVAAAETKQGVAAEAGKTKEGVLYVGSKTKEGVVHGVATVAEKT  
KEQVTNVGGAVVTGVTAVAQKTVEGAGSIAAATGFVYEMPSEEGYQDYEPEA

*del121-140  $\alpha$ -syn*

MDVFMKGLSKAKEGVVAAAETKQGVAAEAGKTKEGVLYVGSKTKEGVVHGVATVAEKT  
KEQVTNVGGAVVTGVTAVAQKTVEGAGSIAAATGFVKKDQLGKNEEGAPQEGILEDMPVDP

*NACsubA $\beta$   $\alpha$ -syn*

MDVFMKGLSKAKEGVVAAAETKQGVAAEAGKTKEGVLYVGSKTKEGVVHGVATVAEKT  
KDAEFRHDSGYEVHHQKLVFFAEDVGSNKGAIIGLMVGGVVIAKKDQLGKNEEGAPQEGILE  
DMPVDPDNEAYEMPSEEGYQDYEPEAATATGCCTGTGGATCCTGACAATGAGGCTTATGAA  
ATGCCTTCTGAGGAAGGGTATCAAGACTACGAACCTGAAGCCTAA

*NACsubA $\beta_{mut}$   $\alpha$ -syn*

MDVFMKGLSKAKEGVVAAAETKQGVAAEAGKTKEGVLYVGSKTKEGVVHGVATVAEKT  
KDAEFRHDSGYEVHHQKLVSFAEDVGSNKGAIIGPMVGGVVIAKKDQLGKNEEGAPQEGILE  
DMPVDPDNEAYEMPSEEGYQDYEPEA
